# Supplementary material for: The adipocyte hormone leptin sets the emergence of hippocampal inhibition in mice
Source: eLife journal article supplement (doi:10.7554/elife.36726), 2018-08-14
Supplement: supp [file elife-36726-supp-v1.zip]

Archive with 13 entries (13 files):
- elife_poa_e36726_Figure_1_figure_supplement_1.tif
- elife_poa_e36726_Figure_3_source_data_1.xlsx
- elife_poa_e36726_Transparent_Reporting_File.pdf
- elife_poa_e36726_Figure_1_figure_supplement_1_source_data_1.xlsx
- elife_poa_e36726_Figure_1_figure_supplement_2.tif
- elife_poa_e36726_Figure_1_source_data_1.xlsx
- elife_poa_e36726_Figure_1_figure_supplement_3.pdf
- elife_poa_e36726_Figure_4_figure_supplement_1.tif
- elife_poa_e36726_Figure_4_figure_supplement_2.tif
- elife_poa_e36726_Figure_4_source_data_1.xlsx
- elife_poa_e36726_Figure_2_source_data_1.xlsx
- elife_poa_e36726_Figure_4_figure_supplement_3.tif
- elife_poa_e36726_Supplementary_File_1.xlsx
