# Supplementary material for: The adipocyte hormone leptin sets the emergence of hippocampal inhibition in mice
Source: eLife journal article supplement (doi:10.7554/elife.36726), 2018-08-14
Supplement: supp [file elife-36726-supp-v1.zip › elife_poa_e36726_Figure_1_figure_supplement_1_source_data_1.xlsx]

## Sheet: Sup Figure 1A
			Plasma leptin level (ng/ml)
								One-way ANOVA of your k	=3 independent treatments:
			WT	ob/ob	ob/ob + Lep
			28.27	1.7	12.42
			9.07	1.8	23.42
			24.42	0.9	11.28			source	sum of	degrees of	mean square	F statistic	p-value
			36.45	0	16.21				squares SS	freedom ν	MS
								treatment	1,122.6128	2	561.306	10.3655	0.0046
								error	487.362	9	54.1514
								total	1,609.9753	11
		Mean	24.5525	1.1	15.8325
		SD	5.738	0.41833	2.73988
		n	4	4	4			Tukey HSD results
								treatments	Tukey HSD	Tukey HSD	Tukey HSD
								pair	Q statistic	p-value	inferfence
								wt vs ob	6.37	0.0037707	** p<0.01
								wt vs ob+Lep	2.37	0.265719	insignificant
								ob ve ob+Lep	4	0.0470639	* p<0.05

## Sheet: Sup Figure 1B
	WT	Control frequency (Hz)	Isoguvacine frequency (Hz)	% of control		ob/ob	Control frequency (Hz)	Isoguvacine frequency (Hz)	% of control		ob/ob + Lep	Control frequency (Hz)	Isoguvacine frequency (Hz)	% of control
		1.3	0.958	73.6923			0.6	0.61	101.667			2.5	3	120
		0.477	0.868	181.971			4.7	1.6	34.0426			0.22	0.4	181.818
		0.145	0.3	206.897			0.58	0.34	58.6207			0.775	1.06	136.774
		0.43	0.85	197.674			1.17	1.16	99.1453			0.7	0.69	98.5714
		0.1	0.33	330			1.1	1	90.9091			0.08	0.15	187.5
		0.2	0.47	235			0.6	0.7	116.667			0.1	0.2	200
							2.01	1.1	54.7264			0.8	1.01	126.25
												0.34	0.6	176.471
	mean	0.442	0.629333	204.206		mean	1.53714	0.93	79.3968		mean	0.689375	0.88875	153.423
	sem	0.166772	0.110192	30.8898		sem	0.519532	0.145616	10.5992		sem	0.260981	0.303194	12.3804
	n	6	6	6		n	7	7	7		n	8	8	8
	p compared to ctr frq (paired t-test)		0.1			p compared to ctr frq (paired t-test)		0.2			p compared to ctr frq (paired t-test)		0.008
						One-way ANOVA of your k	=3 independent treatments:
													Tukey HSD results
													treatments	Tukey HSD	Tukey HSD	Tukey HSD
						source	sum of	degrees of	mean square	F statistic	p-value		pair	Q statistic	p-value	inferfence
							squares SS	freedom ν	MS				wt vs ob/ob	6.0398	0.0012688	** p<0.01
						treatment	51,662.1294	2	25,831.0647	9.3619	0.0016		wt vs ob/ob+lep	2.5316	0.200998	insignificant
						error	49,664.8299	18	2,759.1572				ob/ob vs ob/ob+lep	3.8509	0.0353912	* p<0.05
						total	101,326.9592	20

## Sheet: Sup Figure 1C-D
		WT	ob/ob	ob/ob + Lep				WT	ob/ob	ob/ob + Lep
		Egaba	Egaba	Egaba				RMP	RMP	RMP
		-31	-80	-64				-55	-75	-50
		-65	-91	-81				-60	-90	-80
		-79	-62	-73				-70	-53	-60
		-42	-83	-67				-80	-65	-80
		-65	-75	-22				-60	-75	-60
		-61	-86	-51				-75	-60	-70
		-78	-71	-52				-60	-70	-65
		-39		-46				-50		-60
				-43						-55
				-66						-50
				-67						-50
	Mean	-57.5	-78.2857	-57.4545				-63.75	-69.7143	-61.8182
	sem	6.39754	3.70144	5.01156				3.629	4.53407	3.3216
	n	8	7	11				8	7	11
	one-way ANOVA of your k=3 independent treatment							one-way ANOVA of your k=3 independent treatment
	source	sum of	degrees of	mean square	F statistic	p-value		source	sum of	degrees of	mean square	F statistic	p-value
		squares SS	freedom ν	MS					squares SS	freedom ν	MS
	treatment	2,215.6903	2	1,107.8452	4.5257	0.022		treatment	273.897	2	136.948	1.1191	0.3437
	error	5,630.1558	23	244.789				error	2,814.5649	23	122.372
	total	7,845.8462	25					total	3,088.4615	25
	Tukey HSD results							Tukey HSD results
	treatments	Tukey HSD	Tukey HSD	Tukey HSD				treatments	Tukey HSD	Tukey HSD	Tukey HSD
	pair	Q statistic	p-value	inferfence				pair	Q statistic	p-value	inferfence
	wt vs ob/ob	3.6302	0.0437752	* p<0.05				wt vs ob/ob	1.4733	0.557119	insignificant
	wt vs ob/ob+lep	0.0088	0.899995	insignificant				wt vs ob/ob+lep	0.5315	0.899995	insignificant
	ob/ob vs ob/ob+lep	3.8944	0.0292631	* p<0.05				ob/ob vs ob/ob+lep	2.0878	0.320742	insignificant
