# Supplementary material for: The adipocyte hormone leptin sets the emergence of hippocampal inhibition in mice
Source: eLife journal article supplement (doi:10.7554/elife.36726), 2018-08-14
Supplement: supp [file elife-36726-supp-v1.zip › elife_poa_e36726_Figure_1_source_data_1.xlsx]

## Sheet: Figure 1A-B
	age (postnatal day)	Control frequency (Hz)	Isoguvacine frequency (Hz)	% of control			age (postnatal day)	Control frequency (Hz)	Isoguvacine frequency (Hz)	% of control
WT	0	0.189	0.9	476.19		db/db	0	0.261	1.31	501.916
	0	1.52	4.91	323.026			0	0.058	0.387	667.241
	1	0.605	1.85	305.785			0	0.462	1.4	303.03
	1	3.8	11.2	294.737			0	0.409	1.819	444.743
	1	0.337	1.52	451.039			0	0.06	0.05	83.3333
	1	0.58	2.74	472.414			1	0.11	0.11	100
	1	0.25	0.4	160			1	0.914	3.37	368.709
	1	0.23	0.21	91.3043
	0	1.05	5.05	480.952
	0	1.18	7.14	605.085
	1	1.44	3.02	209.722
	0	0.22	0.2	90.9091
	0	0.11	0.21	190.909
	0	0.35	0.4	114.286
	0	0.33	1.36	412.121
mean	0.466667	0.812733	2.74067	311.899		mean	0.285714	0.324857	1.20657	352.71
sem	0.138013	0.254248	0.841616	44.1389		sem	0.184428	0.115941	0.444957	80.0019
n	14	14	14	14		n	7	7	7	7
p compared to ctr frq (paired t-test)			0.00577079			p compared to ctr frq (paired t-test)			0.0382765
						p compared to wt (unpaired t-test)				0.626469
WT	2	0.13	0.38	292.308		db/db	2	1.03	0.9	87.3786
	2	0.35	0.6	171.429			2	0.12	0.035	29.1667
	2	0.37	0.57	154.054			2	0.39	0.31	79.4872
	3	0.02	0.046	230			3	1.15	0.9	78.2609
	3	0.42	0.63	150			3	0.031	0.008	25.8065
	3	0.03	0.07	233.333			3	0.41	0.28	68.2927
mean	2.5	0.22	0.382667	205.187		mean	2.5	0.521833	0.4055	61.3987
sem	0.204124	0.0674125	0.099249	20.9482		sem	0.204124	0.173614	0.149927	10.055
n	6	6	6	6		n	6	6	6	6
p compared to ctr frq (paired t-test)			0.0115916			p compared to ctr frq (paired t-test)			0.0136352
						p compared to wt (unpaired t-test)				0.000212772
WT	7	0.082	0.127	154.878		db/db	7	0.36	0.28	77.7778
	6	0.046	0.14	304.348			6	0.95	0.46	48.4211
	7	0.48	0.53	110.417			7	0.18	0.16	88.8889
	7	0.92	0.99	107.609			7	1.27	0.35	27.5591
	6	2.34	2.24	95.7265			6	0.56	0.18	32.1429
	7	2.26	4.8	212.389			7	0.39	0.22	56.4103
	6	1.14	1.18	103.509			7	2	1.95	97.5
	7	1.35	1.73	128.148
	7	0.3	0.87	290
mean	6.66667	0.990889	1.40078	167.447		mean	6.71429	0.815714	0.514286	61.2428
sem	0.157135	0.273166	0.45592	25.7117		sem	0.170747	0.225215	0.224516	9.60596
n	9	9	9	9		n	7	7	7	7
p compared to ctr frq (paired t-test)			0.174204			p compared to ctr frq (paired t-test)			0.0494439
						p compared to wt (unpaired t-test)				0.00556143
WT	15	0.308	0.27	87.6623		db/db	15	2.53	1.5	59.2885
	15	0.71	0.44	61.9718			15	1.98	1.38	69.697
	15	2.36	2.49	105.508			15	0.15	0.12	80
	14	3.5	3.4	97.1429			14	0.37	0.5	135.135
	14	1.02	0.3	29.4118			14	0.27	0.1	37.037
	14	0.8	0.75	93.75			14	0.56	0.6	107.143
mean	14.5	1.44967	1.275	79.2412		mean	14.5	0.976667	0.7	81.3834
sem	0.204124	0.456124	0.497922	10.6368		sem	0.204124	0.378004	0.226618	13.0661
n	6	6	6	6		n	6	6	6	6
p compared to ctr frq (paired t-test)			0.20841			p compared to ctr frq (paired t-test)			0.191947
						p compared to wt (unpaired t-test)				0.909896

## Sheet: Figure 1C-D
WT	P1	P3	P6	P15	P20		db/db	P1	P3	P6	P15	P20
	Egaba	Egaba	Egaba	Egaba	Egaba			Egaba	Egaba	Egaba	Egaba	Egaba
	-49	-27	-49	-78	-80			-30	-59	-88	-83	-66
	-39	-41	-41	-62	-80			-60	-74	-108	-87	-94
	-73	-22	-37	-70	-90			-55	-62	-72	-87	-91
	-55	-54	-59	-78	-93			-40	-65	-96	-90	-88
	-23	-77	-65	-76	-70			-39	-61	-100		-64
	-58	-26		-77				-31				-70
	-46	-22
mean	-49	-38.4286	-50.2	-73.5	-82.6		mean	-42.5	-64.2	-92.8	-86.75	-78.8333
sem	6.99405	8.65416	5.27636	2.60448	4.0939		sem	5.06458	2.63439	6.11882	1.43614	5.55228
n	7	7	5	6	5		n	6	5	5	4	6
							p compared to wt (unpaired t-test)	0.431071	0.0231603	0.000752979	0.00492675	0.611791
WT	P1	P3	P6	P15	P20		db/db	P1	P3	P6	P15	P20
	RMP	RMP	RMP	RMP	RMP			RMP	RMP	RMP	RMP	RMP
	-45	-45	-55	-55	-88			-75	-60	-60	-60	-80
	-60	-55	-50	-87	-65			-70	-65	-60	-85	-70
	-55	-57	-40	-74	-70			-60	-60	-65	-70	-75
	-75	-65	-65	-70	-77			-55	-65	-50	-70	-70
	-45	-70	-75	-65	-79			-50	-60	-45		-80
	-48	-60		-75				-45				-40
	-50	-50
mean	-54	-57.4286	-57	-71	-75.8		mean	-59.1667	-62	-56	-71.25	-69.1667
sem	4.73756	3.52767	6.04152	4.37417	3.94208		sem	4.72875	1.22474	3.67423	5.15388	6.11237
n	7	7	5	6	5		n	6	5	5	4	6
							p compared to wt (unpaired t-test)	0.421844	0.280229	0.891033	0.971652	0.40765

## Sheet: Figure 1E
		Plasma leptin level (ng/ml)
WT	Age (postnatal day)	0	5	10	15	20						WT	P1	P3	P6	P15	P20		db/db	P1	P3	P6	P15	P20
		3.68	9.07	21.28	19.14	3.48							Egaba	Egaba	Egaba	Egaba	Egaba			Egaba	Egaba	Egaba	Egaba	Egaba
		3.68	5.96	33.14	16.14	3.75							-49	-27	-49	-78	-80			-30	-59	-88	-83	-66
		0.91	46.5	9.71	9.28	3.48							-39	-41	-41	-62	-80			-60	-74	-108	-87	-94
		4.27	28.27	18.85	16.14	3.95							-73	-22	-37	-70	-90			-55	-62	-72	-87	-91
			22.12	17.15									-55	-54	-59	-78	-93			-40	-65	-96	-90	-88
			24.42	19.54									-23	-77	-65	-76	-70			-39	-61	-100		-64
													-58	-26		-77				-31				-70
	Mean	3.135	22.7233	19.945	15.175	3.665							-46	-22
	SD	0.754592	5.96311	3.10816	2.08835	0.114346						mean	-49	-38.4286	-50.2	-73.5	-82.6		mean	-42.5	-64.2	-92.8	-86.75	-78.8333
	n	4	6	6	4	4						sem	6.99405	8.65416	5.27636	2.60448	4.0939		sem	5.06458	2.63439	6.11882	1.43614	5.55228
												n	7	7	5	6	5		n	6	5	5	4	6
	One-way ANOVA of your k=5 independent treatments:												DEgaba= Egaba WT - Egaba db/db						One-way ANOVA of your k			=5 independent treatments:
												Age (postnatal day)	0	5	10	15	20
	source	sum of	degrees of	mean square	F statistic	p-value							-19	20.5714	37.8	9.5	-16.6		source	sum of	degrees of	mean square	F statistic	p-value
		squares SS	freedom ν	MS									11	35.5714	57.8	13.5	11.4			squares SS	freedom ν	MS
	treatment	1,570.9947	4	392.749	5.2703	0.005							6	23.5714	21.8	13.5	8.4		treatment	9,163.9584	4	2,290.9896	18.4567	1.2249e-06
	error	1,415.9060	19	74.5214									-9	26.5714	45.8	16.5	5.4		error	2,606.6833	21	124.128
	total	2,986.9007	23										-10	22.5714	49.8		-18.6		total	11,770.6418	25
													-18				-12.6
		Tukey HSD results										mean	-6.5	25.7714	42.6	13.25	-3.76667		Tukey HSD results
												sem	5.06458	2.63439	6.11882	1.43614	5.55228
		treatments	Tukey HSD	Tukey HSD	Tukey HSD							n	6	5	5	4	6		treatments	Tukey HSD	Tukey HSD	Tukey HSD
		pair	Q statistic	p-value	inferfence														pair	Q statistic	p-value	inferfence
		P0 vs P5	4.9714	0.0173733	* p<0.05														P0 vs P5	6.7649	0.0010053	** p<0.01
		P0 vs P10	4.2663	0.0490859	* p<0.05														P0 vs P10	10.2926	0.0010053	** p<0.01
		P0 vs P15	2.7894	0.316003	insignificant														P0 vs P15	3.8838	0.0803056	insignificant
		P0 vs P20	0.1228	0.899995	insignificant														P0 vs P20	0.6009	0.899995	insignificant
		P5 vs P10	0.7884	0.899995	insignificant														P5 vs P10	3.3775	0.157699	insignificant
		P5 vs P15	1.9157	0.645486	insignificant														P5 vs P15	2.3693	0.47034	insignificant
		P5 vs P20	4.8369	0.0212633	* p<0.05														P5 vs P20	6.1919	0.0021974	** p<0.01
		P10 vs P15	1.2106	0.899995	insignificant														P10 vs P15	5.5537	0.0062103	** p<0.01
		P10 vs P20	4.1318	0.0594242	insignificant														P10 vs P20	9.7197	0.0010053	** p<0.01
		P15 vs P20	2.6666	0.358415	insignificant														P15 vs P20	3.3463	0.16407	insignificant

## Sheet: Figure 1F
	WT P6	KCC2	b3 tubulin	KCC2/tubulin		db/db P6	KCC2	b3 tubulin	KCC2/tubulin
		20541.3	36957.2	0.555815			26087.5	35303	0.738959
		25123.5	43189.1	0.581709			29967.9	40461.3	0.740656
		32799.6	118756	0.276194			26977.9	40272.8	0.669879
		35188.5	109113	0.322497			40793.8	87477.4	0.466335
		35321.4	101715	0.347258			55805	106780	0.522617
		36616.3	92521	0.395763
	mean	30931.8	83708.5	0.413206		mean	35926.4	62058.9	0.627689
	sem	2676.37	14263.1	0.0517636		sem	5617.97	14668	0.0565676
	n	6	6	6		n	5	5	5
					p compared to Wt (unpaired t-test)				0.0208297
