# Supplementary material for: The adipocyte hormone leptin sets the emergence of hippocampal inhibition in mice
Source: eLife journal article supplement (doi:10.7554/elife.36726), 2018-08-14
Supplement: supp [file elife-36726-supp-v1.zip › elife_poa_e36726_Figure_2_source_data_1.xlsx]

## Sheet: Figure 2 B
	6 DIV								15 DIV
	Control			Control + lep					Control			Control + lep			Sh-LepR			Sh-Rlep + Lep			Sh-Sbl			Sh-Sbl + Lep			VUO			VUO + Lep
	# cultures	Egaba		# cultures	Egaba				# cultures	Egaba		# cultures	Egaba		# cultures	Egaba		# cultures	Egaba		# cultures	Egaba		# cultures	Egaba		# cultures	Egaba		# cultures	Egaba
	1	-73		1	-80				1	-110		1	-89		1	-80		1	-103		1	-90		1	-84		1	-78		1	-75
	1	-64		1	-67				1	-91.7		1	-74		1	-113		1	-100		1	-93		1	-81		1	-74		1	-81
	1	-61		1	-64				1	-96.8		1	-89		2	-100		1	-99		2	-85		1	-76		2	-80		2	-71
	1	-61		1	-72				1	-97.8		1	-87		2	-101		2	-115		2	-88		1	-78		2	-76.4		2	-68
	2	-63		2	-71				2	-99		1	-97		2	-100		2	-100		3	-105		2	-96		3	-80		3	-79
	2	-65		2	-75				2	-100		2	-84		3	-96		2	-112		3	-96		2	-70		3	-84		3	-75
	2	-66		2	-54				2	-97		2	-76		3	-85		3	-97		3	-94		2	-75
	2	-61		2	-44				2	-98		3	-80					3	-110		3	-93		2	-84
	2	-66		2	-57				2	-109		3	-105											3	-84
	2	-72		2	-62				2	-98		4	-75											3	-86
	3	-52		3	-53				3	-107		4	-87											3	-84
	3	-46		3	-54				3	-80		5	-77
	3	-51		3	-59				3	-105		5	-87
	3	-59		3	-45				4	-97
	3	-50		3	-56				4	-100
	3	-64		3	-62				4	-105
	3	-67		3	-68				4	-90
	3	-63		3	-64				5	-90
	3	-60		3	-62				5	-90
									6	-112
									6	-108
	6 DIV	Mean	SEM	number of cells recorded	number of cultures used				15 DIV	Mean	SEM	number of cells recorded	number of cultures used		One-way ANOVA of your k							Tukey HSD results
	control	-61.2632	1.64342	19	3				control	-98.4056	1.74732	21	6		=8 independent treatments:							treatments	Tukey HSD	Tukey HSD	Tukey HSD
	control + leptin	-61.5263	2.18363	19	3				control + leptin	-85.1538	2.50601	13	5									pair	Q statistic	p-value	inferfence
									Sh-LepR	-96.4286	4.14532	7	3		source	sum of	degrees of	mean square	F statistic	p-value		Ctr vs Ctr+Lep	7.3133	0.0010053	** p<0.01
									Sh-LepR + leptin	-104.5	2.41276	8	3			squares SS	freedom ν	MS				Ctr vs Sh-Rlep	1.136	0.899995	insignificant
									Sh-Sbl	-93	2.12132	8	3									Ctr vs Sh-Rlep + Lep	2.3994	0.666342	insignificant
									Sh-Sbl + Lep	-81.6364	2.07265	11	3									Ctr vs Sh-Sbl	2.7194	0.534722	insignificant
									VUO	-78.7333	1.40633	6	3		treatment	6,953.3521	7	993.336	16.9864	4.774e-13		Ctr vs Sh-Sbl + Lep	8.682	0.0010053	** p<0.01
									VUO + Lep	-74.8333	1.97343	6	3		error	4,210.4368	72	58.4783				Ctr vs VUO	8.1404	0.0010053	** p<0.01
															total	11,163.7889	79					Ctr vs VUO + Lep	9.6984	0.0010053	** p<0.01
																						Ctr + Lep vs Sh-LepR	4.4476	0.0470346	* p<0.05
																						Ctr + Lep vs Sh-LepR + leptin	7.9619	0.0010053	** p<0.01
																						Ctr + Lep vs Sh-Sbl	3.2291	0.316972	insignificant
																						Ctr + Lep vs Sh-Sbl + Lep	1.5879	0.899995	insignificant
																						Ctr + Lep vs VUO	2.4058	0.663711	insignificant
																						Ctr + Lep vs VUO + Lep	3.8671	0.128716	insignificant
																						Sh-LepR vs Sh-LepR + leptin	2.8841	0.465362	insignificant
																						Sh-LepR vs Sh-Sbl	1.2251	0.899995	insignificant
																						Sh-LepR vs Sh-Sbl + Lep	5.658	0.0036095	** p<0.01
																						Sh-LepR vs VUO	5.882	0.0021218	** p<0.01
																						Sh-LepR vs VUO + Lep	7.1784	0.0010053	** p<0.01
																						Sh-LepR + leptin vs Sh-Sbl	4.2535	0.0673172	insignificant
																						Sh-LepR + leptin vs Sh-Sbl + Lep	9.0997	0.0010053	** p<0.01
																						Sh-LepR + leptin vs VUO	8.8233	0.0010053	** p<0.01
																						Sh-LepR + leptin vs VUO + Lep	10.1588	0.0010053	** p<0.01
																						Sh-Sbl vs Sh-Sbl + Lep	4.5227	0.0408214	* p<0.05
																						Sh-Sbl vs VUO	4.8854	0.0198213	* p<0.05
																						Sh-Sbl vs VUO + Lep	6.2208	0.0010053	** p<0.01
																						Sh-Sbl + Lep vs VUO	1.0578	0.899995	insignificant
																						Sh-Sbl + Lep vs VUO + Lep	2.4789	0.633624	insignificant
																						VUO vs VUO + Lep	1.2492	0.899995	insignificant

## Sheet: Figure 2D
			ctr	lep	VUO
			220	160	160
			140	980	540
			120	980	900
			220	600	900
			240	340
			200	320
			220
		Mean	194.286	563.333	625
		SEM	17.3009	143.798	176.706
		n	7	6	4
	p compared to control (two-tailed unpaired Student's t-tes)			0.0183766	0.793339
Ctr
	Time	0	20	40	60	80	100	120	140	160	180	200	220	240	260	280	300	320	340	360	380	400	420	440	460	480	500	520	540	560	580	600	620	640	660	680	700	720	740	760	780	800	820	840	860
			1	0.759546	0.746039	0.690955	0.652287	0.650577	0.596018	0.594824	0.581854	0.535984	0.525024	0.474288	0.51549	0.464964	0.427391	0.393948	0.378738	0.331758	0.302247	0.307501	0.262837	0.21962	0.22579
			1	0.888699	0.786903	0.752058	0.619983	0.587453	0.475349	0.400348	0.327725	0.241446	0.190036	0.176328	0.156328	0.136328	0.116328	0.0963279	0.0763279	0.0563279	0.0363279	0.0163279	-0.0036721	-0.0236721	-0.0436721
			1	0.912066	0.826047	0.689333	0.540753	0.564602	0.287796	0.235635	0.363214	0.0941156	-0.0499152	-0.147018	-0.279476	-0.166687	-0.16228	-0.152813	-0.141932	-0.131932	-0.125795	-0.121786	-0.114579	-0.114558	-0.0945049
			1	0.952131	0.819085	0.823205	0.776927	0.713769	0.635015	0.589393	0.50762	0.513257	0.510709	0.411562	0.371522	0.220403	0.260695	0.237872	0.234	0.230294	0.217901	0.168587	0.184618	0.245333	0.215216	0.157152	0.122799	0.0528126	0.0438752	0.0879653
			1	0.903177	0.724426	0.692979	0.779044	0.699307	0.668686	0.649946	0.531607	0.585397	0.585397	0.555397	0.491508	0.491925	0.493185	0.493185	0.411612	0.481286	0.540494	0.533758	0.611217	0.533758	0.550506	0.65518	0.511627	0.625741	0.511627	0.553123
			1	0.749276	0.603608	0.541262	0.54915	0.535811		0.529476	0.51549	0.50762	0.497391	0.467011
			1	0.987149	0.932296	0.861535	0.8112	0.781849	0.688609	0.652972	0.6186	0.553692	0.493624	0.354954	0.309082	0.287538	0.236598	0.184427	0.198258	0.145706	0.116552	0.107105
Mean Lep			1	0.878863	0.776915	0.721618	0.67562	0.647624	0.558579	0.521799	0.492301	0.433073	0.393181	0.327503	0.260742	0.239078	0.228653	0.208824	0.192834	0.185573	0.181288	0.168582	0.188084	0.172096	0.170667
SD			0	0.0344735	0.0384767	0.0396876	0.0428633	0.0338366	0.0623234	0.0577822	0.0408357	0.0710369	0.0881953	0.0911288	0.120485	0.0988021	0.0959182	0.0930962	0.0836242	0.0875441	0.0938979	0.0937953	0.125103	0.11378	0.11523	0.249014	0.194414	0.286464	0.233876	0.232579	#DIV/0!	#DIV/0!	#DIV/0!	#DIV/0!	#DIV/0!	#DIV/0!	#DIV/0!	#DIV/0!	#DIV/0!	#DIV/0!	#DIV/0!	#DIV/0!	#DIV/0!	#DIV/0!	#DIV/0!
n			7	7	7	7	7	7	6	7	7	7	7	7	6	6	6	6	6	6	6	6	5	5	5	2	2	2	2	2	0	0	0	0	0	0	0	0	0	0	0	0	0	0	0
				0.749276	0.564563	0.367011	0.541262	0.535811	0.603608	0.54915
LEP
	Time	0	20	40	60	80	100	120	140	160	180	200	220	240	260	280	300	320	340	360	380	400	420	440	460	480	500	520	540	560	580	600	620	640	660	680	700	720	740	760	780	800	820	840	860	880	900	920	940
			1	0.924261	0.778971	0.711841	0.676231	0.646851	0.562897	0.526058	0.481245	0.451959	0.404609	0.402157	0.33421	0.384055	0.349854	0.316807	0.268326	0.310976	0.257386	0.255525	0.317305	0.229121	0.256174	0.251023	0.244798	0.3163	0.244798	0.266817	0.249748	0.227661	0.239799	0.245726	0.220411	0.225151	0.213346	0.234965	0.176715	0.22795	0.228262	0.264597	0.228514
			1	0.97579	0.986471	0.882584	0.785762	0.883471	0.734727	0.806753	0.716934	0.743412	0.772565	0.813695	0.771553	0.763333	0.741962	0.796983	0.748343	0.746456	0.728095	0.773641	0.739344	0.810596	0.726615	0.781509	0.723197	0.70545	0.679921	0.665468	0.704917	0.664597	0.741403	0.710012	0.692124	0.647547	0.660598	0.601018	0.62195	0.57473	0.577756	0.607441	0.586984	0.58493	0.592919	0.582076	0.578916	0.559015	0.53402
			1	1.01231	0.988566	0.916086	0.89653	0.902294	0.917312	0.928843	0.884642	0.84322	0.928843	0.862831	0.830815	0.763159	0.677027	0.704654	0.660937	0.705697	0.700992	0.710305	0.884029	0.700992	0.768705	0.79228	0.781615	0.664228	0.763159	0.805751	0.745706	0.664228	0.765696	0.813373	0.691106	0.773892	0.767134	0.845977	0.637453	0.636287	0.710188	0.748703	0.664228	0.720982	0.733344	0.716996		0.625171	0.60223
			1	0.954828	0.842398	0.755948	0.762305	0.690442	0.683373	0.664228	0.664228		0.633957	0.618621	0.691106	0.633892	0.767134	0.845977	0.637453	0.633957	0.596149	0.559226	0.550117	0.519838		0.561925	0.56048	0.550974	0.550974	0.535865	0.524024	0.502951	0.482958	0.48602	0.49874	0.459321	0.457075	0.418108	0.373748	0.389636
			1	0.921929	0.937245	0.866765	0.852517	0.800976	0.758664	0.746028	0.723183	0.710195	0.647711	0.625706	0.674099	0.559226	0.620117	0.619838	0.535865	0.512364	0.49055	0.460673	0.359654	0.477105	0.4416	0.433531
			1	0.932474	0.863585	0.855518	0.841662	0.79587	0.830334	0.846114	0.876512	0.882869	0.825332	0.723635	0.656863	0.616139	0.51602	0.52874	0.459321	0.457075	0.418108	0.373748	0.389636	0.333333	0.394491	0.423922	0.367372	0.314302	0.343961	0.460784	0.303922	0.313725	0.294118	0.324683	0.32132	0.29453	0.308691
Mean Lep			1	0.953598	0.89954	0.831457	0.802501	0.786651	0.747884	0.753004	0.724458	0.726331	0.702169	0.674441	0.659774	0.619967	0.612019	0.6355	0.551708	0.561088	0.53188	0.522186	0.540014	0.511831	0.517517	0.540698	0.535492	0.510251	0.516563	0.546937	0.505663	0.474632	0.504795	0.515963	0.48474	0.480088	0.481369	0.525017	0.452467	0.457151	0.505402	0.540247	0.493242	0.652956	0.663132
SD			0	0.0144345	0.0346406	0.0324609	0.0319983	0.0415684	0.0497243	0.0582844	0.0609967	0.0754981	0.0747588	0.0675604	0.0704597	0.057911	0.0640789	0.0792397	0.0700096	0.0674121	0.0733096	0.0810177	0.0936169	0.0890877	0.098999	0.0877054	0.102275	0.0835114	0.0980629	0.0913911	0.100958	0.0893646	0.109348	0.10877	0.0954901	0.103494	0.10393	0.130496	0.109992	0.0926491	0.143747	0.143731	0.134229	0.0680258	0.0702123
n			6	6	6	6	6	6	6	6	6	5	6	6	6	6	6	6	6	6	6	6	6	6	5	6	5	5	5	5	5	5	5	5	5	5	5	4	4	4	3	3	3	2	2
VUO
	Time	0	20	40	60	80	100	120	140	160	180	200	220	240	260	280	300	320	340	360	380	400	420	440	460	480	500	520	540	560	580	600	620	640	660	680	700	720	740	760	780	800	820	840	860
			1	0.642315	0.583531	0.571611	0.566342	0.552093	0.523306	0.518108	0.49549	0.481286
			1	0.922102	0.869749	0.795627	0.756879	0.721767	0.671847	0.666426	0.662195	0.622693	0.613062	0.590591	0.59565	0.555298	0.551932	0.555514	0.563944	0.543292	0.546832	0.59565	0.555298	0.551932	0.555514	0.563944	0.543292	0.546832	0.509254	0.481286	0.411612
			1	0.994089	0.894287	0.849771	0.95582	0.895953	0.955971	0.898094	0.80719	0.775356	0.785345	0.733991	0.733991	0.674505	0.708952	0.694579	0.711786	0.707303	0.764841	0.756008	0.761948	0.739129	0.700919	0.800649	0.716996		0.698594	0.643389	0.706828	0.788085	0.689762	0.635745	0.655985	0.82087	0.770652	0.736348	0.691234	0.764841
			1	0.849671	0.81202	0.822584	0.769274	0.735405	0.696485	0.724092	0.747814	0.701146	0.690527	0.674741	0.742044	0.70328	0.697028	0.634921	0.677493	0.640415	0.614737	0.642581	0.61728	0.638848	0.647547	0.660598	0.601018	0.62195	0.57473	0.577756	0.607441	0.586984	0.58493	0.592919	0.602795	0.587767	0.559015	0.604049	0.578916	0.606319	0.582076	0.52402	0.574409		0.54017
Mean Lep			1	0.852045	0.789897	0.759898	0.762079	0.726304	0.711902	0.70168	0.678172	0.64512	0.696311	0.666441	0.690561	0.644361	0.652637	0.628338	0.651074	0.630337	0.642137	0.664746	0.644842	0.643303	0.63466	0.675064	0.620436	0.584391	0.594193	0.567477	0.575294	0.687535	0.637346	0.614332	0.62939	0.704318	0.664833	0.670198	0.635075	0.68558	0.582076	0.52402	0.574409	#DIV/0!	0.54017
SD			0	0.0758709	0.0709166	0.0637282	0.0795442	0.0702576	0.0898982	0.0785399	0.0677764	0.0628786	0.0498178	0.0416034	0.0475126	0.0452995	0.0504702	0.0402795	0.0446759	0.0476132	0.0644074	0.0475994	0.0612257	0.054085	0.0424665	0.0687127	0.0510752	0.0375589	0.0555173	0.0470765	0.0867242	0.10055	0.0524157	0.0214131	0.026595	0.116551	0.105818	0.0661493	0.0561588	0.0792606	#DIV/0!	#DIV/0!	#DIV/0!	#DIV/0!	#DIV/0!
n			4	4	4	4	4	4	4	4	4	4	3	3	3	3	3	3	3	3	3	3	3	3	3	3	3	2	3	3	3	2	2	2	2	2	2	2	2	2	1	1	1	0	1
[truncated: 1 more columns]
