# Supplementary material for: The adipocyte hormone leptin sets the emergence of hippocampal inhibition in mice
Source: eLife journal article supplement (doi:10.7554/elife.36726), 2018-08-14
Supplement: supp [file elife-36726-supp-v1.zip › elife_poa_e36726_Figure_3_source_data_1.xlsx]

## Sheet: Figure 3A
Arbitrary Unit	membrane KCC2 (Fm)									Internalized KCC2 (Fi)								Total KCC2 (Ft)
		Sbl	Sbl +Lep	Sh3426	Sh3426+Lep	ShR3299	ShR3299+lep	Phluor Intra		Sbl	Lep	Sh73426	Sh73426+Lep	ShR3299	ShR3299+lep	Phluor Intra		Sbl	Lep	Sh73426	Sh73426+Lep	ShR3299	ShR3299+lep	Phluor Intra
		1.25335	0.347703	0.366558	0.882105	1.1654	2.26624	0.0546485		1.60967	1.29623	1.50419	1.92565	0.632412	1.581	0.0381196		2.44568	1.26777	0.448467	1.16708	1.16708	2.51341	2.17443
		0.590174	0.307756	0.138434	1.52957	1.30879	0.630262	0.0431182		1.58239	2.41934	1.47964	2.07011	2.96785	1.87193	0.0544147		1.0323	1.73732	0.527192	0.718756	0.718756	1.20983	2.27473
		0.390034	0.922208	0.420224	1.56309	0.524212	1.24401	0.0349496		1.69643	2.14733	2.57384	0.86989	0.779808	0.230819	0.0790753		0.576292	1.54798	0.545056	2.3233	2.3233	0.968798	2.29642
		1.952	1.1699	2.01565	1.24635	0.678002	0.355485	0.0131539		1.33394	1.22606	1.3833	0.714898	1.17369	0.60555	0.0981155		1.07968	2.28253	0.754348	1.59417	1.59417	2.1811	0.921743
		1.13566	0.513614	0.827498	1.47931	1.33356	1.77843	0.0964401		0.386448	2.54929	1.13789	3.00866	1.55515	0.540547	0.0116895		1.16196	1.2724	1.69941	1.17182	1.17182	1.9603	1.85177
		0.492175	0.381351	1.11696	0.579934	0.926419	0.694289	0.0139294		0.322542	1.61251	0.425342	1.10494	1.84889	1.20492	0.0419596		1.42385	0.8086	0.334142	0.643995	0.643995	2.53679	2.02258
		2.06016	1.20131	0.710902	0.535935	0.254536	2.07219	0.150063		0.607507	0.76264	0.623025	0.360513	3.21703	0.279594	0.0483263		0.944761	1.24178	1.50122	0.36687	0.36687	1.3683	0.549114
		0.612225	0.564684	1.07821	1.14387	1.07935	1.83485	0.132432		0.195427	1.62122	1.1598	1.50535	1.74522	1.49112	0.0411789		1.17701	1.98838	2.28742	0.550976	0.550976	3.02673	2.46367
		1.27048	0.603223	0.929838	0.822588	0.185699	1.18518	0.0777275		0.815898	2.42399	0.535457	1.89131	1.31724	1.3851	0.0124568		1.5687	1.735	2.40266	0.7191	0.7191	1.89523	2.51688
		0.970776	0.102723	0.546789	1.32299	0.80995	2.05449			1.41131	2.4276	0.839668	0.31959	0.0325984	0.702234			1.8489	0.48254	1.61289	0.717305	0.717305	1.29352
		0.52173	0.397064	2.09511	1.15416	0.72693	0.901682			0.0459725	0.527241	0.588208	0.161794	0.0243239	0.465612			1.29476	0.753814	0.911793	3.63504	3.63504	3.19296
		0.756515	1.24029	0.975529	1.35545	0.68243	0.838477			0.0025483	1.67575	0.0309404	0.26333	0.0251532	0.0408714			0.336198	0.669671	0.770471	4.7603	4.7603	2.23497
		0.0181189	0.0408668	0.298543	1.70951	1.76933	2.34107			0.0550578	1.67283	0.108579	2.81036	0.166304	0.048898			0.288321	2.14867	2.29681	2.09678	2.09678	0.881539
		1.18828	0.0289558	1.05381	1.20969	0.667382	0.670944			1.82205	1.48496	0.0230401	0.0715019	0.264392	0.958115			0.661895	3.16775	3.36968	0.533158	0.533158	1.35084
		0.657343	0.175521	0.924532	0.457028		0.145821			2.08453	0.847593	0.10683	0.0820089		0.0290433			1.24391	1.7664	1.11148	2.72772	2.72772	2.43265
		2.27046	0.282742	1.45049	0.757537		0.615577			0.524719	1.75263	0.397057	0.417136		0.0194485			1.2685	0.19392	1.77103	1.18673	1.18673	2.13371
			0.0200195	0.752646	0.855662		0.550086				3.01485	0.0886136	0.18315		0.0941962				0.112238	2.69598	1.28346	1.28346	0.949842
			0.176953								1.76271								1.72367
			0.0474463								1.11461								0.275911
	mean	1.00872	0.448649	0.869246	1.0944	0.865143	1.18701	0.0684957		0.906027	1.70207	0.765025	1.04472	1.125	0.679353	0.0472596		1.14704	1.32507	1.47294	1.54097	1.54097	1.89003	1.89682
	SEM	0.160116	0.0961563	0.142496	0.0933563	0.116118	0.175053	0.0165027		0.181221	0.152946	0.169098	0.236923	0.282666	0.150783	0.00933628		0.136857	0.185502	0.218767	0.295543	0.295543	0.176675	0.231849
	n	16	19	17	17	14	17	9		16	19	17	17	14	17	9		16	19	17	17	17	17	9
		One-way ANOVA of your k								One-way ANOVA of your k								One-way ANOVA of your k
		=7 independent treatments:								=7 independent treatments:								=7 independent treatments:
		source	sum of	degrees of						source	sum of	degrees of	mean square	F statistic	p-value			source	sum of	degrees of	mean square	F statistic	p-value
			squares SS	freedom ν							squares SS	freedom ν	MS						squares SS	freedom ν	MS
			mean square	F statistic	p-value					treatment	20.4909	6	3.4152	5.8421	2.8892e-05			treatment	6.6056	6	1.1009	1.2966	0.2652
			MS							error	59.6271	102	0.5846					error	89.1579	105	0.8491
		treatment	11.9964	6	1.9994	7.5389	1.052e-06			total	80.118	108						total	95.7635	111
		error	27.0515	102	0.2652
		total	39.048	108
		Tukey HSD results								Tukey HSD results								Tukey HSD results
		treatments	Tukey HSD	Tukey HSD	Tukey HSD					treatments	Tukey HSD	Tukey HSD	Tukey HSD					treatments	Tukey HSD	Tukey HSD	Tukey HSD
		pair	Q statistic	p-value	inferfence					pair	Q statistic	p-value	inferfence					pair	Q statistic	p-value	inferfence
		Sbl vs Sbl +Lep	4.5328	0.0289074	* p<0.05					Sbl vs Lep	4.3382	0.0425655	* p<0.05					Sbl vs Lep	0.8052	0.899995	insignificant
		Sbl vs Sh3426	0.6708	0.899995	insignificant					Sbl vs Sh3426	0.7499	0.899995	insignificant					Sbl vs Sh3426	1.436	0.899995	insignificant
		Sbl vs Sh3426+Lep	0.6755	0.899995	insignificant					Sbl vs Sh3426+Lep	0.7353	0.899995	insignificant					Sbl vs Sh3426+Lep	1.7357	0.87509	insignificant
		Sbl vs ShR3299	1.0774	0.899995	insignificant					Sbl vs ShR3299	1.1056	0.899995	insignificant					Sbl vs ShR3299	1.7357	0.87509	insignificant
		Sbl vs ShR3299+lep	1.4056	0.899995	insignificant					Sbl vs ShR3299+lep	1.2049	0.899995	insignificant					Sbl vs ShR3299+lep	3.2737	0.246698	insignificant
		Sbl vs Phluor Intra	6.1967	0.0010053	** p<0.01					Sbl vs Phluor Intra	3.8132	0.109836	insignificant					Sbl vs Phluor Intra	2.7617	0.4528	insignificant
		Lep vs Sh3426	3.907	0.0934727	insignificant					Lep vs Sh3426	5.1916	0.0068764	** p<0.01					Lep vs Sh3426	0.6798	0.899995	insignificant
		Lep vs Sh3426+Lep	5.3117	0.0051917	** p<0.01					Lep vs Sh3426+Lep	3.642	0.144448	insignificant					Lep vs Sh3426+Lep	0.9925	0.899995	insignificant
		Lep vs ShR3299	3.2472	0.255936	insignificant					Lep vs ShR3299	3.0304	0.336126	insignificant					Lep vs ShR3299	0.9925	0.899995	insignificant
		Lep vs ShR3299+lep	6.0734	0.0010053	** p<0.01					Lep vs ShR3299+lep	5.6663	0.0021943	** p<0.01					Lep vs ShR3299+lep	2.5971	0.522933	insignificant
		Lep vs Phluor Intra	2.5799	0.530094	insignificant					Lep vs Phluor Intra	7.5642	0.0010053	** p<0.01					Lep vs Phluor Intra	2.1685	0.698179	insignificant
		Sh3426 vs Sh3426+Lep	1.3672	0.899995	insignificant					Sh3426 vs Sh3426+Lep	1.5083	0.899995	insignificant					Sh3426 vs Sh3426+Lep	0.3044	0.899995	insignificant
		Sh3426 vs ShR3299	0.445	0.899995	insignificant					Sh3426 vs ShR3299	1.8449	0.830423	insignificant					Sh3426 vs ShR3299	0.3044	0.899995	insignificant
		Sh3426 vs ShR3299+lep	2.1086	0.722656	insignificant					Sh3426 vs ShR3299+lep	0.462	0.899995	insignificant					Sh3426 vs ShR3299+lep	1.8662	0.821731	insignificant
		Sh3426 vs ShR3299+lep	5.6966	0.0020325	** p<0.01					Sh3426 vs ShR3299+lep	3.2206	0.26514	insignificant					Sh3426 vs ShR3299+lep	1.5781	0.899995	insignificant
		Sh3426+Lep vs ShR3299	1.7444	0.8715	insignificant					Sh3426+Lep vs ShR3299	0.4115	0.899995	insignificant					Sh3426+Lep vs ShR3299	0	0.899995	insignificant
		Sh3426+Lep vs ShR3299+lep	0.7414	0.899995	insignificant					Sh3426+Lep vs ShR3299+lep	1.9703	0.779198	insignificant					Sh3426+Lep vs ShR3299+lep	1.5618	0.899995	insignificant
		Sh3426+Lep vs Phluor Intra	6.8341	0.0010053	** p<0.01					Sh3426+Lep vs Phluor Intra	4.4755	0.0324602	* p<0.05					Sh3426+Lep vs Phluor Intra	1.3248	0.899995	insignificant
		ShR3299 vs ShR3299+lep	2.449	0.583551	insignificant					ShR3299 vs ShR3299+lep	2.284	0.651001	insignificant					ShR3299 vs ShR3299+lep	1.5618	0.899995	insignificant
		ShR3299 vs Phluor Intra	5.1204	0.0081012	** p<0.01					ShR3299 vs Phluor Intra	4.6658	0.021957	* p<0.05					ShR3299 vs Phluor Intra	1.3248	0.899995	insignificant
		ShR3299+lep vs Phluor Intra	7.4511	0.0010053	** p<0.01					ShR3299+lep vs Phluor Intra	2.8362	0.419871	insignificant					ShR3299+lep vs Phluor Intra	0.0253	0.899995	insignificant

## Sheet: Figure 3C-E
		Culture	pThr906	pThr906/Actin	pThr906/KCC2		pThr1007	pThr1007/Actin	pThr1007/KCC2		KCC2	KCC2/actine		pSer940	Ser906/actine	pSer940/KCC2		Actin		NKCC1	KCC2/actine		KCC2/NKCC1 ratio
	CTL	1	79546	2.10253	0.919769		83673.5	2.21163	0.967493		86484.8	2.28594		62655.7	1.65609	0.724471		37833.4		48603.1	1.28466		1.77941
		2	86459.9	2.20348	0.961517		108278	2.75951	1.20415		89920.3	2.29167		70384.6	1.79379	0.782744		39238		88150	2.24655		1.02008
		3	89731.5	2.44184	0.988743		116696	3.17563	1.28587		90753.2	2.46965		71890.8	1.95635	0.792158		36747.4		98064.2	2.6686		0.925447
		4	103256	2.67304	1.35533		126459	3.27372	1.6599		76185	1.97224		56640.7	1.46629	0.743462		38628.6		81864.7	2.11928		0.93062
		5	88831.1	2.28333	1.40328		131041	3.36831	2.07007		63302.6	1.62714		53801	1.38291	0.849901		38904.1		98420.7	2.52983		0.643184
	mean		89564.9	2.34085	1.12573		113230	2.95776	1.4375		81329.2	2.12933		63074.5	1.65109	0.778547		38270.3		37296.5	2.16978		1.05975
	sem		3860.25	0.0998815	0.104379		8373.71	0.213525	0.193386		5199.14	0.148923		3596.75	0.104796	0.0217364		445.898		9153.37	0.241902		0.190752
	Leptin	6	22357.6	0.563633	2.11774		38048.8	0.959208	3.60402		10557.3	0.266149		9915.76	0.249976	0.939233		39666.9		16330.5	0.411691		0.646477
		7	26386.3	0.674096	2.29671		36969.8	0.944475	3.21791		11488.7	0.293505		9582.63	0.24481	0.834089		39143.2		16366.8	0.418126		0.701955
		8	29801.9	0.766459	2.55782		39193.6	1.008	3.36388		11651.3	0.299654		9237.79	0.237582	0.792855		38882.5		32712.8	0.841323		0.35617
		9	25750	0.674059	2.04707		32407.9	0.848345	2.57636		12579	0.32928		11064.9	0.289646	0.879635		38201.4		27412	0.717566		0.458885
		10	32705.6	0.842103	2.23642		26213.8	0.67495	1.79251		14624.1	0.37654		10411.7	0.268081	0.711958		38838.1		45431	1.16975		0.321897
	mean		27400.3	0.70407	2.25115		34566.8	0.886996	2.91094		12180.1	0.313026		10042.6	0.258019	0.831554		38946.4		27650.6	0.711692		0.497077
	sem		1776.16	0.0471525	0.0882567		2384.73	0.0589989	0.327307		690.046	0.0187824		320.68	0.00937649	0.0385445		237.558		5464.86	0.141923		0.0762552
	p compared to control (two-tailed unpaired Student's t-test)				3.54836e-05				0.00470287			2.01198e-06				0.265252					0.000823512		0.0254882

## Sheet: Figure 3F
	Egaba	Sh-Sbl	Sh-Sbl + Lep	Sh-WNK	Sh-WNK + Lep	WNK-CA	WNK-CA + Lep			One-way ANOVA of your k=6 independent treatments:
		-90	-79	-101	-95	-92	-78			source	sum of	degrees of	mean square	F statistic	p-value
		-93	-94	-100	-92	-76	-78				squares SS	freedom ν	MS
		-85	-77	-100	-101	-73	-81			treatment	5,731.0355	5	1,146.2071	33.9905	8.8818e-16
		-88	-83	-99	-94	-66	-68			error	1,888.4000	56	33.7214
		-105	-68	-100	-98	-73	-78			total	7,619.4355	61
		-96	-79	-99	-98	-77	-74
		-94	-75	-100	-100	-68	-76			Tukey HSD results
		-93	-89	-103	-103	-76	-72
			-85		-99					treatments	Tukey HSD	Tukey HSD	Tukey HSD
			-84		-102					pair	Q statistic	p-value	inferfence
			-81							Sh-Sbl vs Sh-Sbl + Lep	6.7822	0.0010053	** p<0.01
			-76							Sh-Sbl vs Sh-WNK	3.5313	0.142386	insignificant
			-78							Sh-Sbl vs Sh-WNK + Lep	2.6698	0.422117	insignificant
			-96							Sh-Sbl vs WNK-CA	8.7064	0.0010053	** p<0.01
			-70							Sh-Sbl vs WNKCA +Lep	8.4629	0.0010053	** p<0.01
			-75							Sh-Sbl + Lep vs Sh-WNK	11.0028	0.0010053	** p<0.01
			-84							Sh-Sbl + Lep vs Sh-WNK + Lep	10.5954	0.0010053	** p<0.01
			-84							Sh-Sbl + Lep vs WNK-CA	3.624	0.124268	insignificant
			-86							Sh-Sbl + Lep vs WNK-CA + Lep	3.3329	0.189351	insignificant
			-84							Sh-WNK vs Sh-WNK + Lep	1.0525	0.899995	insignificant
										Sh-WNK vs WNK-CA + Lep	12.2377	0.0010053	** p<0.01
										Sh-WNK vs WNK-CA + Lep	11.9941	0.0010053	** p<0.01
	mean	-93	-80.5	-100.25	-97.625	-75.125	-75.625			Sh-WNK + Lep vs WNK-CA	11.8471	0.0010053	** p<0.01
	sem	2.12132	2.87849	0.453163	1.32203	2.78027	1.46309			Sh-WNK + Lep vs WNK-CA + Lep	11.5904	0.0010053	** p<0.01
	n	8	8	8	8	8	8			WNK-CA vs WNK-CA + Lep	0.2435	0.899995	insignificant
