# Supplementary material for: The adipocyte hormone leptin sets the emergence of hippocampal inhibition in mice
Source: eLife journal article supplement (doi:10.7554/elife.36726), 2018-08-14
Supplement: supp [file elife-36726-supp-v1.zip › elife_poa_e36726_Figure_4_source_data_1.xlsx]

## Sheet: Figure 4 B
	ND	age (postnatal day)	Control frequency (Hz)	Isoguvacine frequency (Hz)	% of control		DIO	age (postnatal day)	Control frequency (Hz)	Isoguvacine frequency (Hz)	% of control
		5	2.6	6.1	234.615			6	4.8	6.6	137.5
		5	0.3	3.3	1100			6	2.5	16	640
		5	0.5	11	2200			6	7.7	1.7	22.0779
		5	0.5	3.5	700			6	9.4	3.2	34.0426
		5	218	197	90.367			6	1.06	0.05	4.71698
		5	14	86	614.286			6	0.4	0.2	50
		5	15	35	233.333			6	0.07	0.28	400
		5	23	35	152.174			6	0.84	0.96	114.286
		5	39	89	228.205			6	0.096	0.12	125
		6	20	24.1	120.5			5	0.6	10.2	1700
		6	18	24	133.333			5	0.67	10.8	1611.94
		6	22	30	136.364			5	0.54	1.2	222.222
		6	19	15	78.9474			5	0.67	5.8	865.672
		6	12	29	241.667			5	0.15	0.43	286.667
								5	0.64	13	2031.25
	mean	5.35714	28.85	42	447.414		mean	5.6	2.00907	4.70267	549.692
	sem	0.132894	14.8366	13.9039	155.896		sem	0.130931	0.757124	1.3921	177.069
	n	14	14	14	14		n	15	15	15	15
	p compared to ctr frq (paired t-test)			0.0509854			p compared to ctr frq (paired t-test)			0.111038
							p compared to ND (unpaired t-test)				0.669852
	ND	age (postnatal day)	Control frequency (Hz)	Isoguvacine frequency (Hz)	% of control		DIO	age (postnatal day)	Control frequency (Hz)	Isoguvacine frequency (Hz)	% of control
		10	21	8	38.0952			11	0.4	3.6	900
		10	2.7	1.1	40.7407			11	0.37	3.7	1000
		10	0.175	0.162	92.5714			11	1.9	4.2	221.053
		10	0.33	0.21	63.6364			11	0.6	2.4	400
		10	1.05	1.1	104.762			11	0.1	0.21	210
		10	1.2	1.14	95			11	2.46	2.5	101.626
		10	0.21	0.071	33.8095			11	1.46	1.85	126.712
		10	0.13	0.15	115.385			10	0.34	0.23	67.6471
		10	0.61	0.05	8.19672			10	1.7	0.2	11.7647
		10	7.7	1.7	22.0779			10	2.03	0.24	11.8227
		10	0.7	0.25	35.7143			10	1.49	1.5	100.671
								10	0.96	0.15	15.625
								10	1.2	1.4	116.667
								10	2.2	7.3	331.818
								10	1.85	7.39	399.459
								10	0.489	2.7	552.147
								10	1.07	5.01	468.224
	mean	10	3.255	1.26664	59.0899		mean	10.4118	1.21288	2.62235	296.19
	sem	0	1.89411	0.694946	11.123		sem	0.123038	0.179935	0.567299	72.2683
	n	11	11	11	11		n	17	17	17	17
	p compared to ctr frq (paired t-test)			0.135153			p compared to ctr frq (paired t-test)			0.0190821
							p compared to ND (unpaired t-test)		0.191927		0.0148614
	ND	age (postnatal day)	Control frequency (Hz)	Isoguvacine frequency (Hz)	% of control		DIO	age (postnatal day)	Control frequency (Hz)	Isoguvacine frequency (Hz)	% of control
		13	1.7	0.4	23.5294			13	0.05	0.24	480
		13	0.35	0.21	60			13	1.19	1.1	92.437
		12	0.14	0.15	107.143			13	0.9	0.03	3.33333
		12	1.05	0.09	8.57143			13	0.1	0.6	600
		12	0.9	0.08	8.88889				0.04	0.17	425
	mean	12.4	0.828	0.186	41.6265		mean	13	0.456	0.428	320.154
	sem	0.244949	0.27538	0.0583609	18.8704		sem	0	0.245002	0.192546	115.561
	n	5	5	5	5		n	4	5	5	5
	p compared to ctr frq (paired t-test)			0.0616296			p compared to ctr frq (paired t-test)			0.909235
							p compared to ND (unpaired t-test)		0.342404		0.0446353
	ND	age (postnatal day)	Control frequency (Hz)	Isoguvacine frequency (Hz)	% of control		DIO	age (postnatal day)	Control frequency (Hz)	Isoguvacine frequency (Hz)	% of control
		15	13.98	7.21	51.5737			15	35	17	48.5714
		15	5.36	2.33	43.4701			15	12	11.9	99.1667
		15	8.87	7.65	86.2458			15	6	2	33.3333
		15	3.8	0.236	6.21053			15	36	35	97.2222
		15	1.03	0.905	87.8641			15	9	6	66.6667
		15	2.08	1.9	91.3462			15	0.75	0.8	106.667
		15	0.7	0.06	8.57143			15	1.46	1.83	125.342
		15	1.08	0.36	33.3333			15	0.65	1.03	158.462
		15	0.84	0.6	71.4286			15	2.6	0.8	30.7692
		15	0.134	0.06	44.7761			15	1.5	3.31	220.667
		15	20.28	4.26	21.0059			15	0.4	0.25	62.5
		15	8.98	9.2	102.45			15	0.15	0.16	106.667
	mean	15	5.5945	2.89758	54.023		mean	15	8.7925	6.67333	96.3361
	sem	0	1.82863	0.965122	9.65213		sem	0	3.76045	2.98728	15.8009
	n	12	12	12	12		n	12	12	12	12
	p compared to ctr frq (paired t-test)			0.0706175			p compared to ctr frq (paired t-test)			0.189415
							p compared to ND (unpaired t-test)		0.452518		0.0322988
	ND	age (postnatal day)	Control frequency (Hz)	Isoguvacine frequency (Hz)	% of control		DIO	age (postnatal day)	Control frequency (Hz)	Isoguvacine frequency (Hz)	% of control
		20	27	14	51.8519			20	7	3	42.8571
		20	29	5	17.2414			20	1.7	0.3	17.6471
		20	33	22	66.6667			20	0.82	0.176	21.4634
		21	9	8	88.8889			20	8.3	4.2	50.6024
		21	4.1	1.19	29.0244			20	39	22	56.4103
		21	4.8	1.24	25.8333			20	5.8	6.1	105.172
		21	22	14	63.6364			20	14.9	7.4	49.6644
		21	55	28	50.9091			20	13.8	9.6	69.5652
		21	42	17	40.4762			20	27	25	92.5926
		21	21	3	14.2857
	mean	20.7	24.69	11.343	44.8814		mean	20	13.1467	8.64178	56.2194
	sem	0.152753	5.16171	2.91227	7.58776		sem	0	4.18667	2.99946	9.75137
	n	10	10	10	10		n	9	9	9	9
	p compared to ctr frq (paired t-test)			0.00186017			p compared to ctr frq (paired t-test)			0.0326178
							p compared to ND (unpaired t-test)		0.105032		0.366547

## Sheet: Figure 4D
	sham	age (postnatal day)	Control frequency (Hz)	Isoguvacine frequency (Hz)	% of control		Lep	age (postnatal day)	Control frequency (Hz)	Isoguvacine frequency (Hz)	% of control
		11	24.5	12.8	52.2449			11	0.57	1.2	210.526
		11	29	20	68.9655			11	15	13.2	88
		11	5.3	5.8	109.434			11	8.9	5.1	57.3034
		11	5.9	3.2	54.2373			11	1.93	2.39	123.834
		11	1.8	0.1	5.55556			11	1.7	1.5	88.2353
		11	0.66	0.23	34.8485			11	0.334	0.7	209.581
		11	1.6	0.6	37.5			11	0.61	0.83	136.066
		11	0.43	0.4	93.0233			11	0.23	0.1	43.4783
		12	0.14	0.15	107.143			11	1.3	1.6	123.077
		12	1.05	0.09	8.57143			12	0.7	0.9	128.571
		12	0.9	0.08	8.88889			12	1.5	0.09	6
								12	0.5	0.23	46
								12	0.32	0.1	31.25
								12	0.45	0.76	168.889
	mean	11.2727	6.48	3.95	52.7647		mean	11.3571	2.43171	2.05	104.344
	sem	0.140836	3.09047	1.99251	11.566		sem	0.132894	1.13362	0.925893	17.1775
	n	11	11	11	11		n	14	14	14	14
	p compared to ctr frq (paired t-test)			0.0627847			p compared to ctr frq (paired t-test)			0.256492
							p compared to N sham (unpaired t-test)	0.66937			0.027894

## Sheet: Figure 4F
	ND	kcc2	tub	Kcc2/tub		DIO	kcc2	tub	Kcc2/tub
		16731.7	15612.1	1.07171			16954.9	24702.7	0.686358
		33356.2	16809.6	1.98436			20246.7	31404.4	0.644709
		20580.2	19278.3	1.06753			34287.2	340237	0.100775
		7405.33	7706.12	0.960967			13519	18429	0.733572
		16719.3	24574.9	0.680343			11426.3	39632.9	0.288302
	mean	18958.6	16796.2	1.15298		mean	19286.8	90881.2	0.490743
	sem	4203.41	2745	0.219699		sem	4039.97	62438.4	0.125298
	n	5	5	5		n	5	5	5
						p compared to ND (unpaired t-test)			0.0307266
	Sham	kcc2	tub	Kcc2/tub		Leptin	kcc2	tub	Kcc2/tub
		19110	13636.1	1.40142			7646	33942	0.225267
		15953.2	18032.9	0.884672			6041	14503	0.416535
		51831.9	20940.1	2.47524			14071.1	15993.7	0.879794
							20282.9	26810.3	0.756534
							14856.1	31868.6	0.466167
	mean	28965	17536.4	1.58711		mean	12579.4	24623.5	0.548859
	sem	11469.7	2123.05	0.468451		sem	2586.91	4006.28	0.118682
	n	3	3	3		n	5	5	5
						p compared to sham (unpaired t-test)			0.033095
