# Supplementary material for: The adipocyte hormone leptin sets the emergence of hippocampal inhibition in mice
Source: eLife journal article supplement (doi:10.7554/elife.36726), 2018-08-14
Supplement: supp [file elife-36726-supp-v1.zip › elife_poa_e36726_Supplementary_File_1.xlsx]

## Sheet: PCR of KCC2 & NKCC1 
	PCR analysis on P6 wt and db/db hippocampi
		KCC2			NKCC1
		Wt	db/db		Wt	db/db
		1.51	1.7		1.45	1.36
		1.02	2.81		1.22	1.51
		1.39	1.52		1.49	1.74
		1.84	3.77		0.555	1.34
		2.1	2.92		0.431	0.626
		2.18	2.92		1.41	0.522
	mean	1.67333	2.60667		1.09267	1.183
	SEM	0.182605	0.346118		0.194024	0.201687
	p compared to wt (two-tailed unpaied t-tes)		0.0382838			0.753511

## Sheet: Western blot  KCC2 in wt & ob 
		Western blot analysis on P8 wt and ob/ob hippocampi
		wt	kcc2	tub	Kcc2/tub		ob	kcc2	tub	Kcc2/tub
			9162	13972	0.65574			21181	11624	1.82218
			20595	175002	0.117684			3211.86	12708	0.252742
			8019.91	17814.1	0.450201			19809.7	12494.8	1.58543
			24048.2	68348.9	0.351845			39778.4	63384.4	0.627573
			26825	65388.9	0.410237			48730.8	59860.2	0.814078
			19975.9	57348.9	0.348322			45096.4	60754.6	0.742271
		mean	18104.3	66312.5	0.389005		mean	29634.7	36804.3	0.974046
		sem	3176.72	23798	0.0711792		sem	7240.58	10980.8	0.245815
		n	6	6	6		n	6	6	6
		p compared to wt (two-tailed unpaied t-tes)								0.0453139

## Sheet: serum leptin level
serum leptin level in P10-P15 wt mice
	ND	HFD		sham	IP leptin injection
	17	37.7143		21.2857	37.7143
	19	18.1429		33.1429	20.5714
	19.1429	34.8571		9.71429	20.4286
	16.1429	36.2857		18.8571	28.5714
	9			17	39.1429
	16.1429				53.4286
					54.8571
					39.1429
mean	16.0714	31.75		20	36.7321
sem	1.51534	4.57306		3.8111	4.65496
n	6	4		5	8
p compared to wt (two-tailed unpaied t-tes)		0.00493738			0.0289812

## Sheet: Western Blot NKCC1 in wt & db
	Western blot analysis on P6 wt and db/db hippocampi
	wt	Nkcc1	tub	Nkcc1/tub		db	Nkcc1	tub	Nkcc1/tub
		17397.2	29796.2	0.583872			15563.2	30091.6	0.517195
		16581.5	29217.6	0.567518			18122	30322.4	0.597645
		16026.2	29779.3	0.538166			16914.6	30105.5	0.561846
	mean	16668.3	29597.7	0.563185		mean	16866.6	30173.1	0.558895
	sem	398.131	190.12	0.0133706		sem	739.06	74.7373	0.0232708
	n	3	3	3		n	3	3	3
	p compared to wt (two-tailed unpaied t-tes)								0.880749
