# Supplementary figures and images for: The adipocyte hormone leptin sets the emergence of hippocampal inhibition in mice
Source: eLife journal article supplement (doi:10.7554/elife.36726), 2018-08-14

db WT ladder (-)

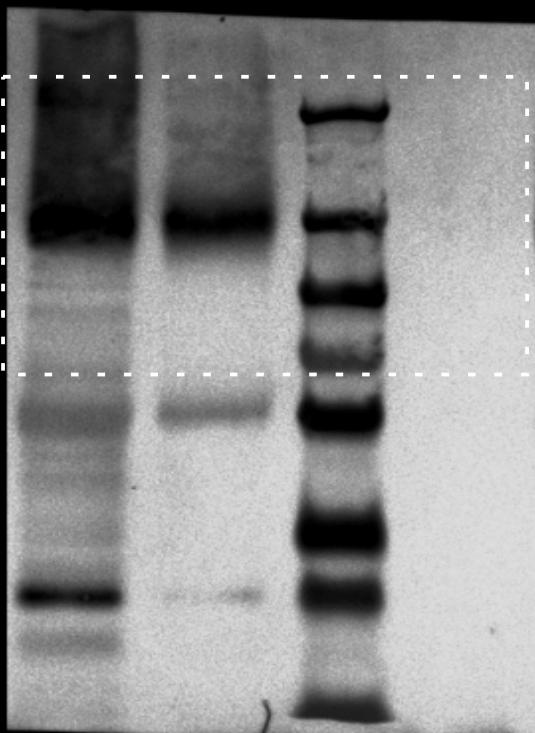

KCC2

db WT ladder (-)

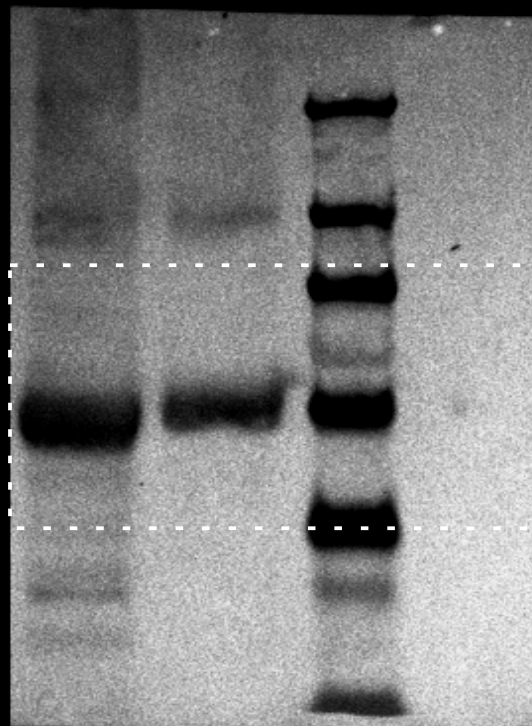

Tubulin

Supplement: supp [file elife-36726-supp-v1.zip]

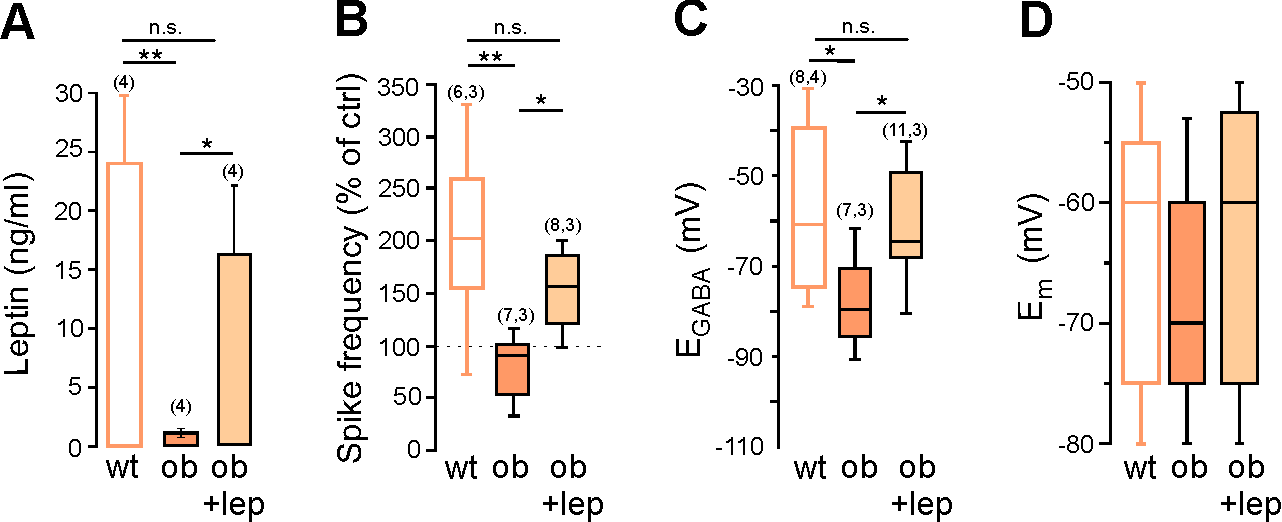

Supplement: supp [file elife-36726-supp-v1.zip › elife_poa_e36726_Figure_1_figure_supplement_1.tif]

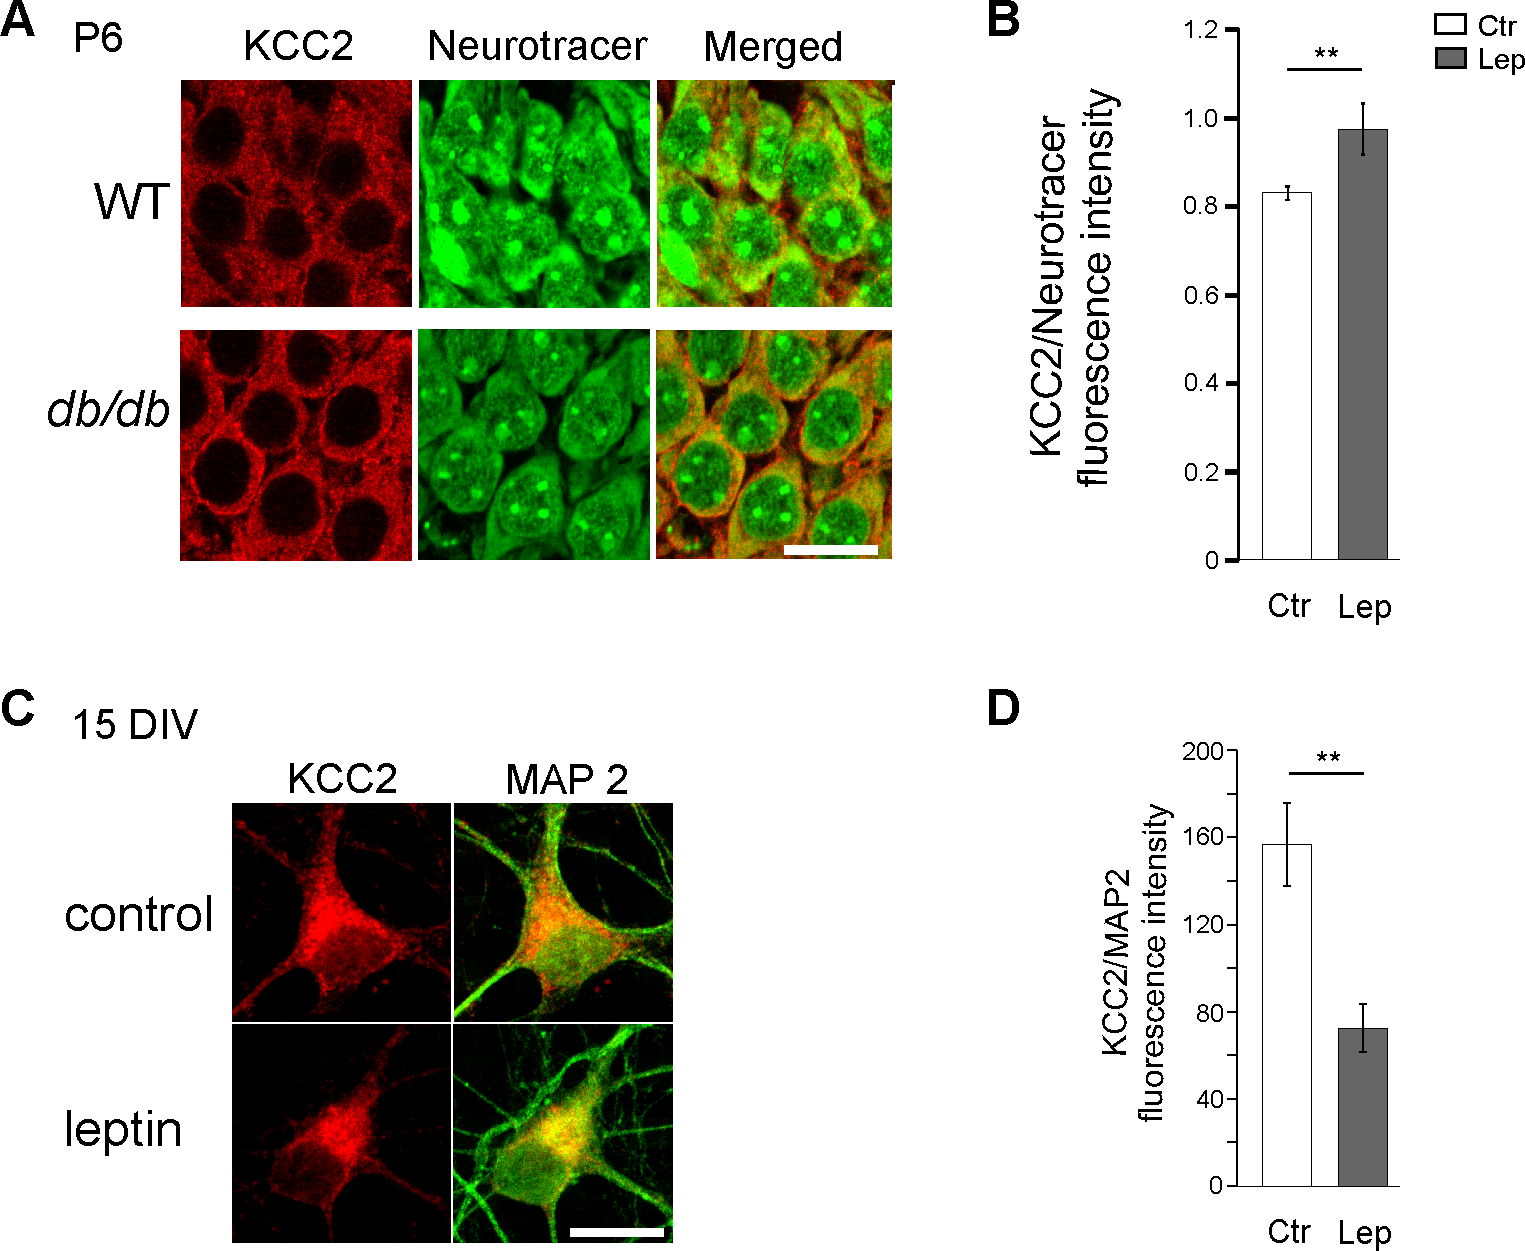

Supplement: supp [file elife-36726-supp-v1.zip › elife_poa_e36726_Figure_1_figure_supplement_2.tif]

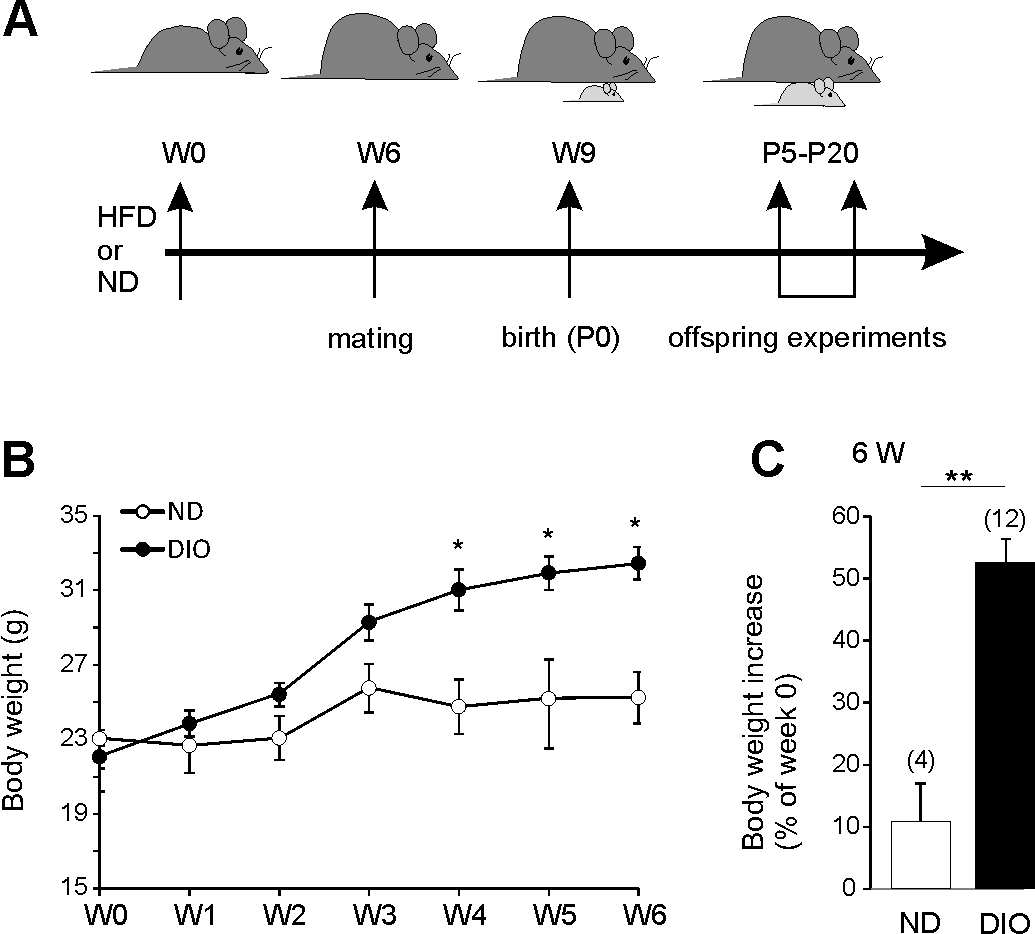

Supplement: supp [file elife-36726-supp-v1.zip › elife_poa_e36726_Figure_4_figure_supplement_1.tif]

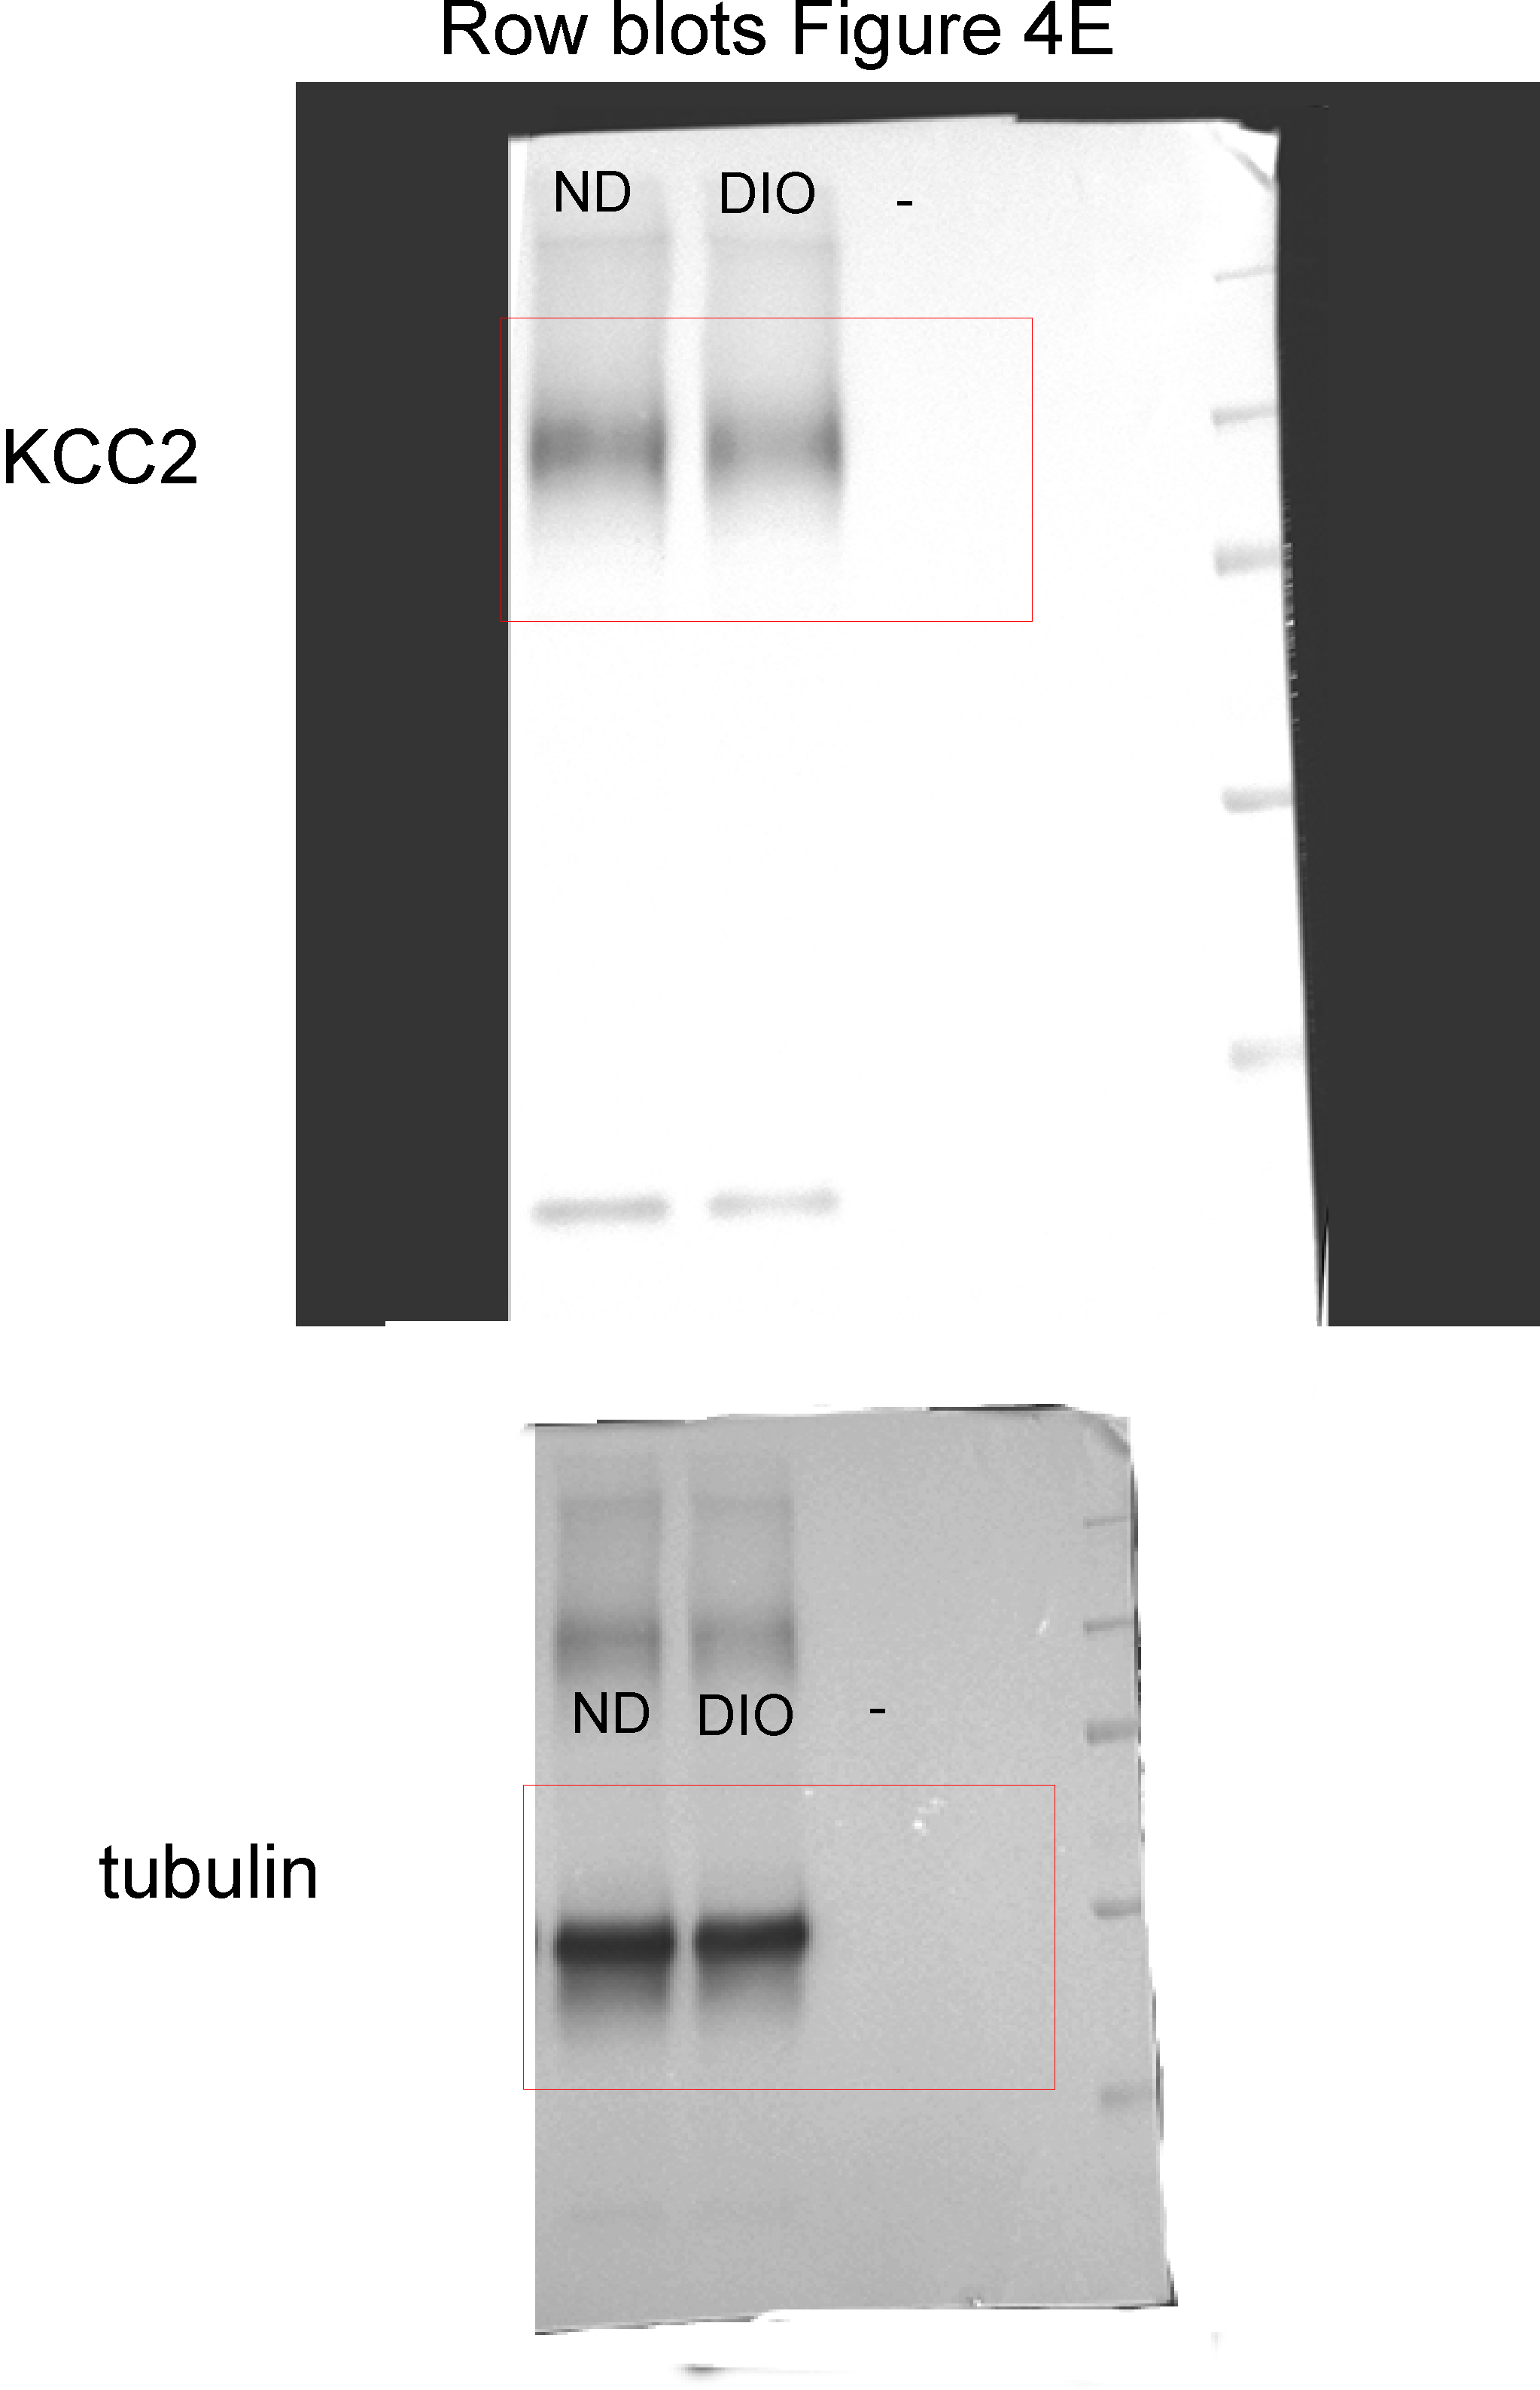

Supplement: supp [file elife-36726-supp-v1.zip › elife_poa_e36726_Figure_4_figure_supplement_2.tif]

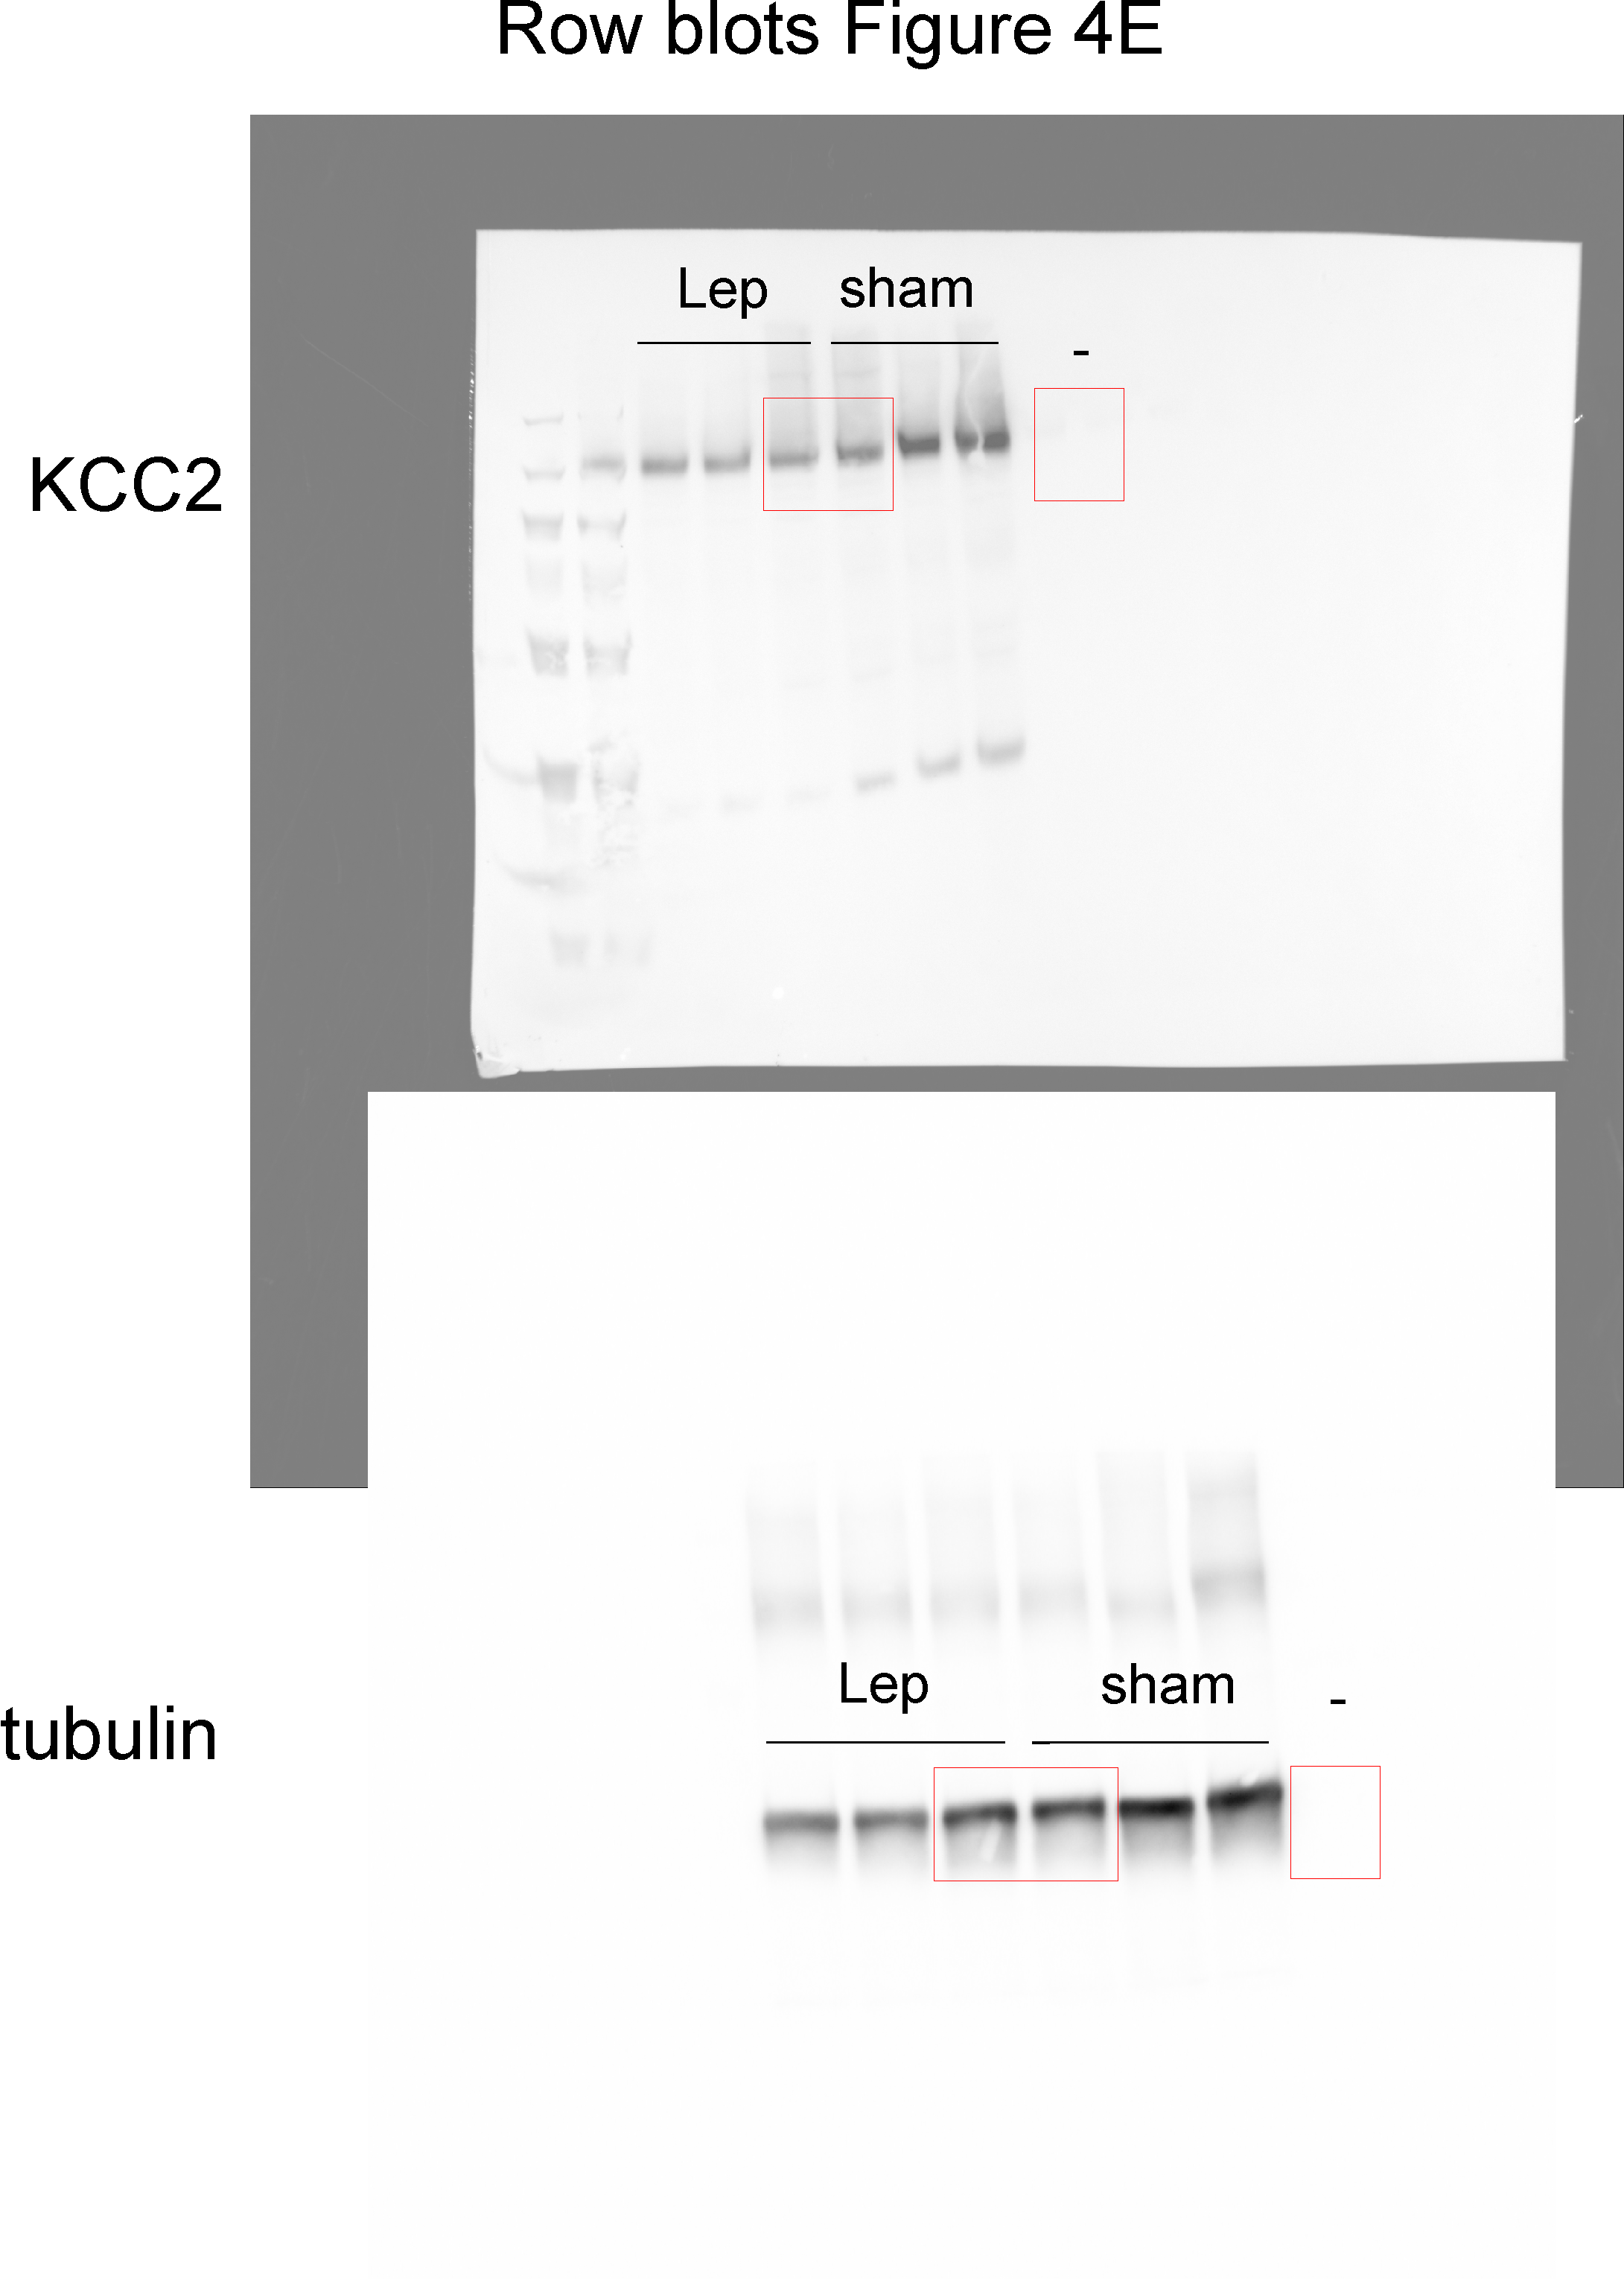

Supplement: supp [file elife-36726-supp-v1.zip › elife_poa_e36726_Figure_4_figure_supplement_3.tif]
